# Supplementary material for: Organic and Inorganic Amendments Shape Bacterial Indicator Communities That Can, In Turn, Promote Rice Yield
Source: MDPI journal article supplement (doi:10.3390/microorganisms10020482), 2022-02-21
Supplement: s1 [file s1]

# Organic and Inorganic Amendments Shape Bacterial Indicator Communities That Can, In Turn, Promote Rice Yield

Chongwen Qiu <sup>1,2,†</sup>, Yuanyuan Bao <sup>3,†</sup>, Evangelos Petropoulos <sup>4</sup>, Yiming Wang <sup>3</sup>, Zhenfang Zhong <sup>2</sup>, Yaozhi Jiang <sup>2</sup>, Xuhong Ye <sup>1,\*</sup>, Xiangui Lin <sup>3,\*</sup> and Youzhi Feng <sup>3</sup>

<sup>1</sup> Ministry of Agriculture Key Laboratory for Northeast Preservation of Cultivated Land, National Engineering Research Centre for Efficient Utilization of Soil and Fertilizer Resources, College of Land and Environment, Shenyang Agricultural University, Shenyang 110000, China; qcwabc@163.com (C.Q.); yexuhong1980@163.com (X.Y.)

<sup>2</sup> Guangdong Haina Institute of Agriculture, Huizhou 516000, China; hnnyzzf@126.com (Z.Z.); 18871996518@163.com (Y.J.)

<sup>3</sup> State Key Laboratory of Soil and Sustainable Agriculture, Institute of Soil Science, Chinese Academy of Sciences, Nanjing 210008, China; yybao@issas.ac.cn (Y.B.); ymwang@issas.ac.cn (Y.W.); xglin@issas.ac.cn (X.L.); yzfeng@issas.ac.cn (Y.F.)

<sup>4</sup> School of Civil Engineering and Geosciences, Newcastle University, Newcastle upon Tyne NE1 7RU, UK; vagpetrop@gmail.com

\* Correspondence: yexuhong1980@163.com (X.Y.); xglin@issas.ac.cn (X.L.); Tel.: +086-024-82887155 (X.Y.); +086-025-86881589 (X.L.); Fax: +086-024-82887155 (X.Y.); +086-025-86881000 (X.L.)

† These authors have contributed equally to this work.

**Supplementary Materials.**

**Table S1.** Soil chemical and microbial properties under different fertilization regimes.

| Treatment | Soil chemical properties |                    |                     |              |                     |                    |              |                     |                     | Soil microbial properties                                                  |                                                           |                                                 |                                                    |
|-----------|--------------------------|--------------------|---------------------|--------------|---------------------|--------------------|--------------|---------------------|---------------------|----------------------------------------------------------------------------|-----------------------------------------------------------|-------------------------------------------------|----------------------------------------------------|
|           | pH                       | TN                 | AP                  | TK           | AK                  | SOM                | C/N          | MC                  | MN                  | Urease                                                                     | Acid phosphatase                                          | Dehydrogenase                                   | Invertase                                          |
|           | 1:2.5                    | g kg <sup>-1</sup> | mg kg <sup>-1</sup> | %            | mg kg <sup>-1</sup> | g kg <sup>-1</sup> | /            | mg kg <sup>-1</sup> | mg kg <sup>-1</sup> | mg NH <sub>4</sub> <sup>+</sup> -N g <sup>-1</sup> d.w.s day <sup>-1</sup> | mg hydroxybenzene g <sup>-1</sup> d.w.s day <sup>-1</sup> | mg TPF g <sup>-1</sup> d.w.s hour <sup>-1</sup> | mg glucose g <sup>-1</sup> d.w.s day <sup>-1</sup> |
| CK        | 5.14 ± 0.05b             | 1.44±0.03a         | 23.28 ± 0.87a       | 2.06 ± 0.06b | 69.51 ± 6.31a       | 24.23 ± 0.9a       | 9.04 ± 0.16a | 496.02 ± 21.27a     | 97.21 ± 2.95a       | 0.48 ± 0.03a                                                               | 1.72 ± 0.07a                                              | 2.73 ± 0.08a                                    | 21.78 ± 0.56b                                      |
| F         | 4.98 ± 0.06a             | 1.44 ± 0.13a       | 28.49 ± 1.71b       | 1.94 ± 0.09a | 57.71 ± 5.25a       | 25.65 ± 0.32a      | 9.66 ± 0.96a | 489.26 ± 28.05a     | 104.44 ± 4.05a      | 0.55 ± 0.01a                                                               | 2.14 ± 0.14b                                              | 3.02 ± 0.13b                                    | 20.5 ± 0.65a                                       |
| MR        | 5.23 ± 0.08c             | 2.12 ± 0.13c       | 42.11 ± 3.64c       | 2.22 ± 0.07c | 89.66 ± 12.14b      | 36.07 ± 2.21c      | 9.13 ± 0.1a  | 634.17 ± 61.66c     | 142.88 ± 14c        | 0.72 ± 0.04b                                                               | 2.97 ± 0.09c                                              | 3.9 ± 0.03d                                     | 23.83 ± 0.74c                                      |
| MRF       | 5.21 ± 0.05bc            | 1.69 ± 0.06b       | 30.56 ± 0.7b        | 2.25 ± 0.03c | 59.27 ± 10.26a      | 29.05 ± 1.47b      | 9.23 ± 0.29a | 560.1 ± 9.81b       | 120.43 ± 7.63b      | 0.69 ± 0.13b                                                               | 2.23 ± 0.05b                                              | 3.42 ± 0.06c                                    | 23.58 ± 0.22c                                      |

Different letters denote significant differences ( $P < 0.05$ ).

**Table S2.** Random forest (RF) mean predictor importance (percentage of increase of mean square error) of the bacterial indicator taxa enriched in each treatment as drivers for the soil multi-nutrient cycling index (that is, SOM, TN, TK, AP, AK, pH, C/N, MBC, MBN, urease activity, invertase activity, acid phosphatase activity, and dehydrogenase activity).

| Treatment | Bacterial taxa                  | Increase in mean square error (MSE) (%) |      |      |      |      |      |      |                        |                      |                        |                    |                     |                     |
|-----------|---------------------------------|-----------------------------------------|------|------|------|------|------|------|------------------------|----------------------|------------------------|--------------------|---------------------|---------------------|
|           |                                 | Soil chemical properties                |      |      |      |      |      |      | Soil enzyme activities |                      |                        |                    | Microbial biomass   |                     |
|           |                                 | SOM                                     | TN   | TK   | AP   | AK   | pH   | C/N  | Urease activity        | Phosphatase activity | Dehydrogenase activity | Invertase activity | Microbial biomass C | Microbial biomass N |
| CK        | Unclassified_Selenomonadales    | 5.5                                     | 3.1  | 1.0  | 6.3  | 1.3  | 0.9  | 3.6  | 5.9                    | 7.7                  | 7.4                    | 2.1                | 2.3                 | 7.6                 |
|           | Unclassified_Firmicutes         | 4.3                                     | 5.3  | 6.7  | 5.8  | 4.2  | 7.4  | 3.1  | 3.5                    | 4.0                  | 6.1                    | 9.5                | 6.7                 | 4.9                 |
|           | Bacillus                        | 1.9                                     | 3.8  | 3.7  | 3.8  | 0.7  | 4.6  | 3.2  | 1.9                    | 2.0                  | 2.3                    | 5.0                | 4.0                 | 0.9                 |
|           | Unclassified_Nitrospirales      | 9.2                                     | 8.4  | 0.3  | 6.4  | 4.6  | 2.8  | 1.9  | 7.8                    | 7.9                  | 12.6                   | 5.0                | 6.5                 | 9.6                 |
|           | Unclassified_Holophagae_2       | 1.3                                     | 3.0  | 0.1  | 1.1  | 2.4  | 0.9  | 1.0  | 1.4                    | 0.1                  | 0.3                    | 0.3                | 3.2                 | 1.8                 |
|           | Unclassified_Holophagae_1       | 2.2                                     | 3.9  | 0.4  | 2.0  | 2.2  | 2.6  | 0.9  | 1.9                    | 0.9                  | 0.0                    | 1.0                | 1.0                 | 1.4                 |
|           | Unclassified_Chloroplast        | 8.0                                     | 8.0  | 4.4  | 6.1  | 5.8  | 5.2  | 0.3  | 9.7                    | 3.2                  | 5.0                    | 5.5                | 7.1                 | 7.8                 |
|           | Unclassified_Planctomycetaceae  | 2.8                                     | 0.6  | 3.9  | 2.1  | 2.7  | 0.2  | 0.8  | 2.8                    | 3.1                  | 2.0                    | 0.4                | 0.3                 | 0.6                 |
| SUM       |                                 | 35.2                                    | 36.2 | 20.4 | 33.5 | 23.9 | 24.6 | 14.9 | 34.8                   | 29.0                 | 35.8                   | 28.8               | 31.0                | 34.7                |
| F         | Unclassified_Ignavibacteriales  | 3.3                                     | 2.1  | 2.6  | 1.3  | 2.4  | 1.8  | 0.0  | 0.0                    | 0.7                  | 0.7                    | 1.6                | 3.7                 | 4.2                 |
|           | Unclassified_Bacteroidete       | 4.6                                     | 0.6  | 3.7  | 3.9  | 1.3  | 4.5  | 1.2  | 3.6                    | 5.1                  | 3.5                    | 2.3                | 0.7                 | 2.0                 |
|           | SUM                             | 7.9                                     | 2.6  | 6.3  | 5.2  | 3.7  | 6.3  | 1.2  | 3.7                    | 5.7                  | 4.3                    | 3.9                | 4.4                 | 6.2                 |
| MR        | Unclassified_Acidobacteriaceae  | 1.9                                     | 3.0  | 1.6  | 3.1  | 3.9  | 3.6  | 1.8  | 0.7                    | 1.1                  | 3.9                    | 0.8                | 0.4                 | 1.8                 |
|           | Bradyrhizobium                  | 1.2                                     | 0.5  | 1.7  | 2.8  | 0.6  | 1.5  | 0.2  | 1.1                    | 4.6                  | 0.1                    | 0.5                | 1.4                 | 1.9                 |
|           | Unclassified_Aminicenantes      | 4.8                                     | 5.8  | 2.2  | 5.0  | 0.4  | 3.0  | 3.2  | 3.2                    | 3.2                  | 3.4                    | 4.7                | 1.5                 | 4.0                 |
|           | Unclassified_Rhodospirillales_1 | 4.6                                     | 6.3  | 0.6  | 7.6  | 4.6  | 2.6  | 2.4  | 1.5                    | 7.9                  | 3.7                    | 1.7                | 0.6                 | 4.1                 |
|           | SUM                             | 12.5                                    | 15.5 | 6.0  | 18.5 | 9.5  | 10.7 | 7.6  | 6.5                    | 16.7                 | 11.1                   | 7.6                | 3.8                 | 11.8                |
| MRF       | Unclassified_Phycisphaeraceae   | 4.1                                     | 3.5  | 6.3  | 3.2  | 0.7  | 7.2  | 2.2  | 6.2                    | 3.5                  | 6.1                    | 8.9                | 5.5                 | 5.2                 |
|           | Nocardioides                    | 4.2                                     | 3.4  | 3.1  | 2.4  | 0.6  | 5.3  | 2.7  | 4.9                    | 2.1                  | 5.9                    | 2.0                | 2.7                 | 4.5                 |
|           | Marmoricola                     | 4.2                                     | 3.5  | 0.9  | 3.3  | 2.6  | 2.0  | 2.7  | 0.4                    | 3.0                  | 3.8                    | 1.9                | 2.5                 | 0.5                 |
|           | Unclassified_GOUTA4             | 2.2                                     | 1.8  | 1.4  | 2.3  | 1.0  | 2.4  | 1.3  | 1.9                    | 1.2                  | 3.5                    | 0.1                | 0.6                 | 0.9                 |
|           | Tetrasphaera                    | 2.7                                     | 4.2  | 0.1  | 4.6  | 4.0  | 0.3  | 0.7  | 0.9                    | 5.5                  | 4.8                    | 0.6                | 3.0                 | 1.6                 |
|           | Unclassified_Actinobacteria     | 1.4                                     | 0.8  | 0.5  | 2.8  | 0.9  | 0.7  | 1.0  | 2.8                    | 3.6                  | 4.2                    | 0.0                | 0.9                 | 0.3                 |
|           | Unclassified_Acidobacteria      | 2.1                                     | 4.2  | 5.9  | 4.3  | 0.8  | 1.9  | 1.8  | 2.1                    | 3.9                  | 4.4                    | 3.4                | 3.3                 | 3.4                 |
|           | Unclassified_Intrasporangiaceae | 5.1                                     | 5.2  | 3.4  | 4.9  | 6.3  | 3.2  | 1.2  | 0.6                    | 5.1                  | 4.3                    | 1.2                | 4.0                 | 2.5                 |
|           | Unclassified_Rhodospirillales_2 | 1.1                                     | 0.8  | 1.6  | 3.6  | 0.7  | 1.0  | 1.3  | 3.6                    | 2.9                  | 1.8                    | 0.2                | 0.7                 | 1.6                 |
|           | Unclassified_Sphingobacteriales | 0.9                                     | 0.1  | 2.5  | 1.3  | 0.8  | 3.7  | 0.6  | 1.7                    | 1.7                  | 1.2                    | 2.9                | 1.0                 | 0.4                 |
| SUM       |                                 | 28.0                                    | 27.5 | 25.7 | 32.8 | 18.3 | 27.5 | 15.4 | 25.0                   | 32.3                 | 40.0                   | 21.1               | 24.3                | 21.1                |

“SUM” means the sum importance of all the bacterial indicator taxa enriched in each treatment as drivers for each soil nutrient cycling index.

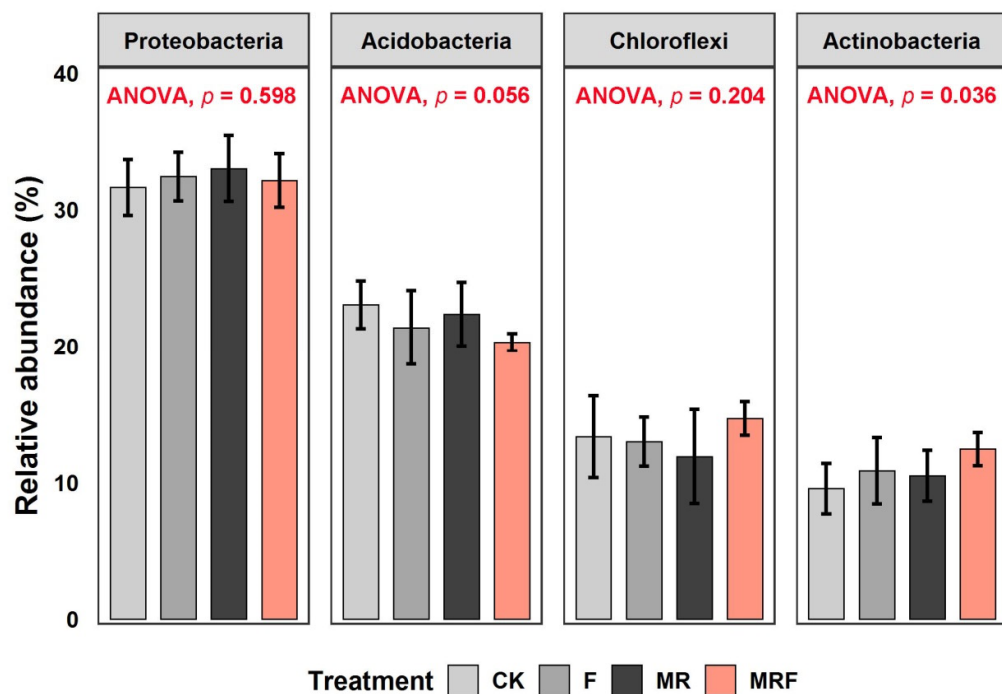

**Figure S1.** Relative abundances of dominant bacteria among different fertilization regimes. The error bars indicate standard deviations of means.

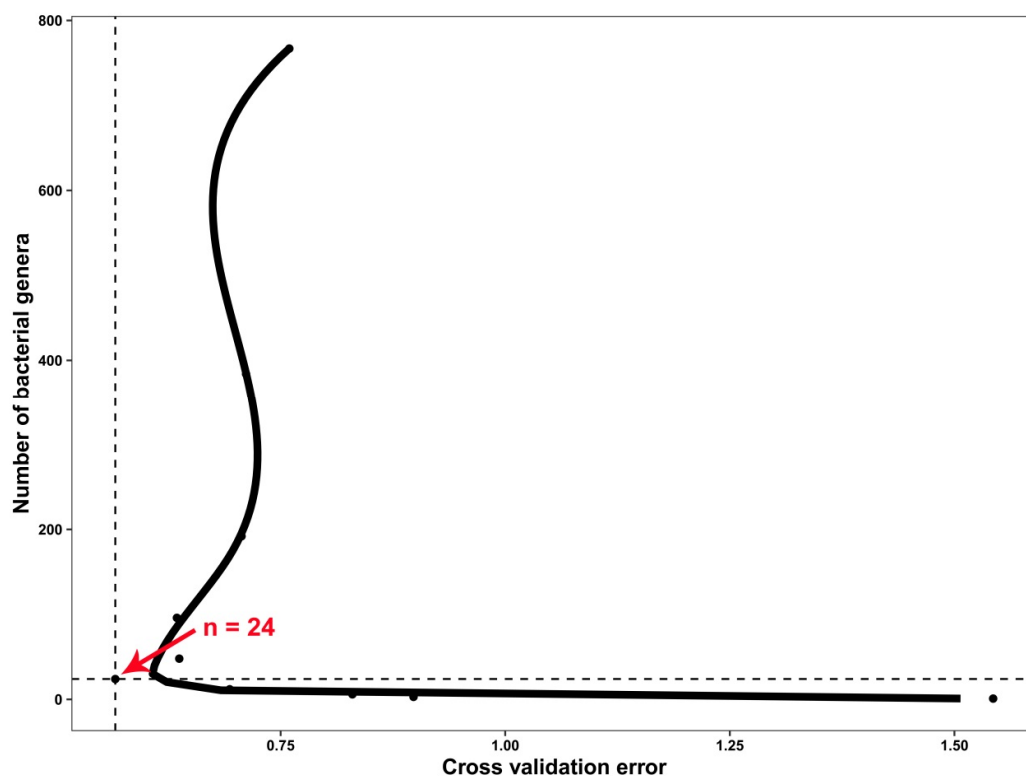

**Figure S2.** The number of bacterial genera against the cross-validation error curve.

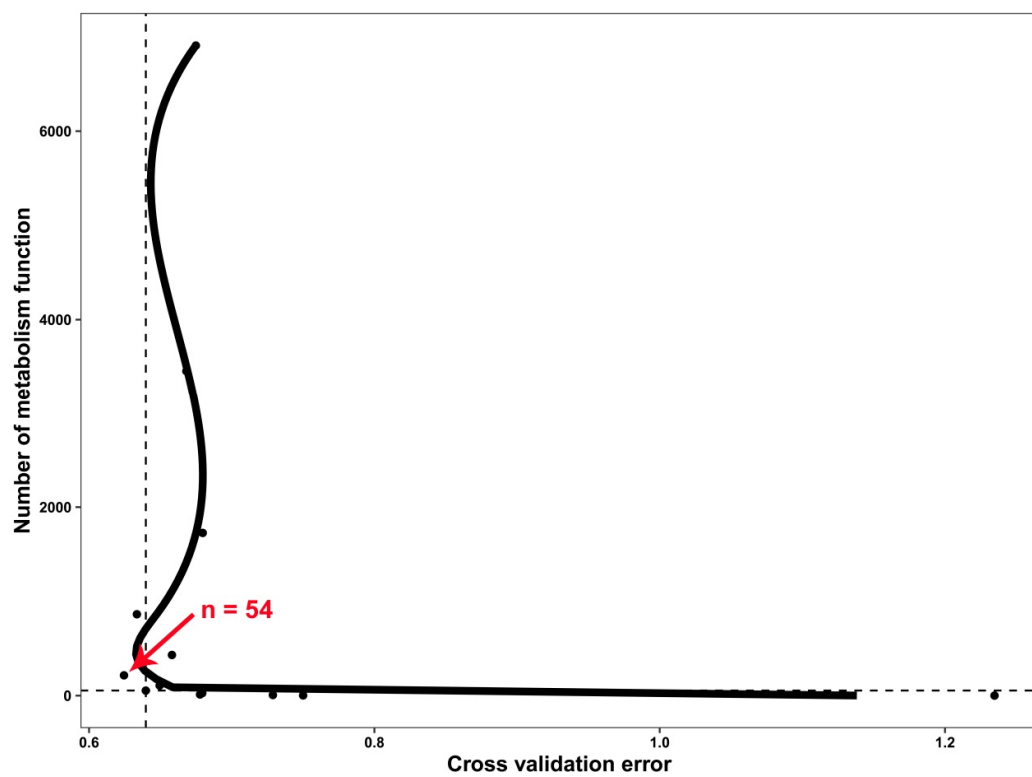

Figure S3. The number of metabolism function against the cross-validation error curve.
